# Supplementary material for: Fifteen-Year Differences in Indications for Cardiac Resynchronization Therapy in International Guidelines—Insights from the Heart Failure Registries of the European Society of Cardiology
Source: MDPI journal article supplement (doi:10.3390/jcm11113236), 2022-06-06
Supplement: s1 [file s1]

**Supplementary Table S1.** Indications for Cardiac Resynchronization Therapy in the major international guidelines.

| Guidelines | Class/LOE | Inclusion Criteria                                                                                                                                                                                                                                                                               |
|------------|-----------|--------------------------------------------------------------------------------------------------------------------------------------------------------------------------------------------------------------------------------------------------------------------------------------------------|
| ESC 2007   | I/A       | <ul style="list-style-type: none"> <li>- NYHA class III-IV despite OMT</li> <li>- LVEF <math>\leq 35\%</math></li> </ul>                                                                                                                                                                         |
|            | I/B       | <ul style="list-style-type: none"> <li>- LV dilation*</li> <li>- QRS <math>\geq 120</math> ms</li> <li>- SR</li> </ul> <p>*LV dilation (different criteria in clinical trials: LVEDD <math>&gt; 55</math> mm or <math>&gt; 30</math> mm/m<sup>2</sup> or <math>&gt; 30</math> mm/m (height))</p> |
|            | IIa/C     | <ul style="list-style-type: none"> <li>- NYHA class III-IV despite OMT</li> <li>- LVEF <math>\leq 35\%</math></li> <li>- LV dilation</li> <li>- Indication for permanent pacing</li> </ul>                                                                                                       |

|          |       |                                                                                                                                                                                                        |
|----------|-------|--------------------------------------------------------------------------------------------------------------------------------------------------------------------------------------------------------|
|          | IIa/C | <ul style="list-style-type: none"> <li>- NYHA class III-IV despite OMT</li> <li>- LVEF <math>\leq 35\%</math></li> <li>- LV dilation</li> <li>- Permanent AF and indication for AV ablation</li> </ul> |
| ESC 2010 | I/A   | <ul style="list-style-type: none"> <li>- NYHA class III-IV** despite OMT</li> <li>- LVEF <math>\leq 35\%</math></li> <li>- QRS <math>\geq 120</math> ms</li> <li>- SR</li> </ul>                       |
|          | I/A   | <ul style="list-style-type: none"> <li>- NYHA class II despite OMT</li> <li>- LVEF <math>\leq 35\%</math></li> <li>- QRS <math>\geq 150</math> ms</li> <li>- SR</li> </ul>                             |

|                              |                           |                                                                                                                                                                                                                                |
|------------------------------|---------------------------|--------------------------------------------------------------------------------------------------------------------------------------------------------------------------------------------------------------------------------|
|                              | IIa/B                     | <ul style="list-style-type: none"> <li>- NYHA class III-IV* despite OMT</li> <li>- LVEF <math>\leq 35\%</math></li> <li>- QRS <math>\geq 130</math> ms</li> <li>- Pacemaker dependency induced by AV nodal ablation</li> </ul> |
|                              | IIa/C                     | <ul style="list-style-type: none"> <li>- NYHA class III-IV* despite OMT</li> <li>- LVEF <math>\leq 35\%</math></li> <li>- QRS <math>\geq 130</math> ms</li> <li>- Slow ventricular rate and frequent pacing</li> </ul>         |
| ACC/AHA/HRS<br><br>2012/2013 | I/A (B for NYHA class II) | <ul style="list-style-type: none"> <li>- NYHA class II-IV** despite OMT</li> <li>- LVEF <math>\leq 35\%</math></li> <li>- QRS <math>\geq 150</math> ms</li> <li>- LBBB</li> <li>- SR</li> </ul>                                |

|  |       |                                                                                                                                                                                                                                                                         |
|--|-------|-------------------------------------------------------------------------------------------------------------------------------------------------------------------------------------------------------------------------------------------------------------------------|
|  | IIa/B | <ul style="list-style-type: none"> <li>- NYHA class II-IV** despite OMT</li> <li>- LVEF <math>\leq 35\%</math></li> <li>- QRS 120-149 ms</li> <li>- LBBB</li> <li>- SR</li> </ul>                                                                                       |
|  | IIa/A | <ul style="list-style-type: none"> <li>- NYHA class III-IV** despite OMT</li> <li>- LVEF <math>\leq 35\%</math></li> <li>- QRS <math>\geq 150</math> ms</li> <li>- Non-LBBB</li> <li>- SR</li> </ul>                                                                    |
|  | IIa/B | <ul style="list-style-type: none"> <li>- NYHA class II-IV** despite OMT</li> <li>- LVEF <math>\leq 35\%</math></li> <li>- LBBB QRS <math>\geq 120</math> ms lub non-LBBB QRS <math>\geq 150</math> ms</li> <li>- Permanent AF and indication for AV ablation</li> </ul> |

|  |       |                                                                                                                                                                                                              |
|--|-------|--------------------------------------------------------------------------------------------------------------------------------------------------------------------------------------------------------------|
|  | IIb/C | <ul style="list-style-type: none"> <li>- NYHA class I despite OMT</li> <li>- LVEF <math>\leq 30\%</math>, ischemic etiology</li> <li>- QRS <math>\geq 150</math> ms</li> <li>- LBBB</li> <li>- SR</li> </ul> |
|  | IIb/B | <ul style="list-style-type: none"> <li>- NYHA class III-IV** despite OMT</li> <li>- LVEF <math>\leq 35\%</math></li> <li>- QRS 120-149 ms</li> <li>- Non-LBBB</li> <li>- SR</li> </ul>                       |
|  | IIb/B | <ul style="list-style-type: none"> <li>- NYHA class II despite OMT</li> <li>- LVEF <math>\leq 35\%</math></li> <li>- QRS <math>\geq 150</math> ms</li> <li>- Non-LBBB</li> <li>- SR</li> </ul>               |

| Guidelines | Class/LOE | Inclusion Criteria                                                                                                                                                                                 |
|------------|-----------|----------------------------------------------------------------------------------------------------------------------------------------------------------------------------------------------------|
| ESC 2013   | I/A       | <ul style="list-style-type: none"> <li>- NYHA class III-IV** despite OMT</li> <li>- LVEF <math>\leq 35\%</math></li> <li>- QRS <math>&gt;150</math> ms</li> <li>- LBBB</li> <li>- SR</li> </ul>    |
|            | I/B       | <ul style="list-style-type: none"> <li>- NYHA class II-IV** despite OMT</li> <li>- LVEF <math>\leq 35\%</math></li> <li>- QRS 120-150 ms</li> <li>- LBBB</li> <li>- SR</li> </ul>                  |
|            | Iia/B     | <ul style="list-style-type: none"> <li>- NYHA class II-IV** despite OMT</li> <li>- LVEF <math>\leq 35\%</math></li> <li>- QRS <math>&gt;150</math> ms</li> <li>- non-LBBB</li> <li>- SR</li> </ul> |

|          |       |                                                                                                                                                                                                                          |
|----------|-------|--------------------------------------------------------------------------------------------------------------------------------------------------------------------------------------------------------------------------|
|          | IIb/B | <ul style="list-style-type: none"> <li>- NYHA class II-IV** despite OMT</li> <li>- LVEF <math>\leq 35\%</math></li> <li>- QRS 120-150 ms</li> <li>- non-LBBB</li> <li>- SR</li> </ul>                                    |
|          | IIa/B | <ul style="list-style-type: none"> <li>- NYHA class III-IV* despite OMT</li> <li>- LVEF <math>\leq 35\%</math></li> <li>- QRS <math>\geq 120</math> ms</li> <li>- Permanent AF and indication for AV ablation</li> </ul> |
| ESC 2015 | I/A   | <ul style="list-style-type: none"> <li>- NYHA class III-IV despite OMT</li> <li>- LVEF <math>\leq 35\%</math></li> <li>- QRS <math>&gt; 150</math> ms</li> <li>- LBBB</li> <li>- SR</li> </ul>                           |

|  |       |                                                                                                                                                                                                   |
|--|-------|---------------------------------------------------------------------------------------------------------------------------------------------------------------------------------------------------|
|  | I/B   | <ul style="list-style-type: none"> <li>- NYHA class III-IV despite OMT</li> <li>- LVEF <math>\leq 35\%</math></li> <li>- QRS 120-150 ms</li> <li>- LBBB</li> <li>- SR</li> </ul>                  |
|  | IIa/B | <ul style="list-style-type: none"> <li>- NYHA class III-IV despite OMT</li> <li>- LVEF <math>\leq 35\%</math></li> <li>- QRS <math>&gt;150</math> ms</li> <li>- non-LBBB</li> <li>- SR</li> </ul> |
|  | IIb/B | <ul style="list-style-type: none"> <li>- NYHA class III-IV despite OMT</li> <li>- LVEF <math>\leq 35\%</math></li> <li>- QRS 120-150 ms</li> <li>- non-LBBB</li> <li>- SR</li> </ul>              |



|          |       |                                                                                                                                                                                                                                             |
|----------|-------|---------------------------------------------------------------------------------------------------------------------------------------------------------------------------------------------------------------------------------------------|
|          | IIa/B | <ul style="list-style-type: none"> <li>- NYHA class III-IV despite OMT</li> <li>- LVEF <math>\leq 35\%</math></li> <li>- QRS <math>\geq 120</math> ms</li> <li>- non-LBBB</li> <li>- Permanent AF and indication for AV ablation</li> </ul> |
| ESC 2016 | I/A   | <ul style="list-style-type: none"> <li>- NYHA class II-IV despite OMT</li> <li>- LVEF <math>\leq 35\%</math></li> <li>- QRS <math>\geq 150</math> ms</li> <li>- LBBB</li> <li>- SR</li> </ul>                                               |
|          | I/B   | <ul style="list-style-type: none"> <li>- NYHA class II-IV despite OMT</li> <li>- LVEF <math>\leq 35\%</math></li> <li>- QRS 130-149 ms</li> <li>- LBBB</li> <li>- SR</li> </ul>                                                             |

|  |      |                                                                                                                                                                                                                                             |
|--|------|---------------------------------------------------------------------------------------------------------------------------------------------------------------------------------------------------------------------------------------------|
|  | Ia/B | <ul style="list-style-type: none"> <li>- NYHA class II-IV despite OMT</li> <li>- LVEF <math>\leq 35\%</math></li> <li>- QRS <math>\geq 150</math> ms</li> <li>- non-LBBB</li> <li>- SR</li> </ul>                                           |
|  | Ib/B | <ul style="list-style-type: none"> <li>- NYHA class II-IV despite OMT</li> <li>- LVEF <math>\leq 35\%</math></li> <li>- QRS 130-149 ms</li> <li>- non-LBBB</li> <li>- SR</li> </ul>                                                         |
|  | Ia/B | <ul style="list-style-type: none"> <li>- NYHA class III-IV despite OMT</li> <li>- LVEF <math>\leq 35\%</math></li> <li>- QRS <math>\geq 130</math> ms</li> <li>- non-LBBB</li> <li>- Permanent AF and indication for AV ablation</li> </ul> |

|          |       |                                                                                                                                                                                                   |
|----------|-------|---------------------------------------------------------------------------------------------------------------------------------------------------------------------------------------------------|
| ESC 2021 | I/A   | <ul style="list-style-type: none"> <li>- NYHA class II-IV despite OMT</li> <li>- LVEF <math>\leq 35\%</math></li> <li>- QRS <math>\geq 150</math> ms</li> <li>- LBBB</li> <li>- SR</li> </ul>     |
|          | IIa/B | <ul style="list-style-type: none"> <li>- NYHA class II-IV despite OMT</li> <li>- LVEF <math>\leq 35\%</math></li> <li>- QRS 130-149 ms</li> <li>- LBBB</li> <li>- SR</li> </ul>                   |
|          | IIa/B | <ul style="list-style-type: none"> <li>- NYHA class II-IV despite OMT</li> <li>- LVEF <math>\leq 35\%</math></li> <li>- QRS <math>\geq 150</math> ms</li> <li>- non-LBBB</li> <li>- SR</li> </ul> |

|                   |       |                                                                                                                                                                                                                                                         |
|-------------------|-------|---------------------------------------------------------------------------------------------------------------------------------------------------------------------------------------------------------------------------------------------------------|
|                   | IIb/B | <ul style="list-style-type: none"> <li>- NYHA class II-IV despite OMT</li> <li>- LVEF <math>\leq 35\%</math></li> <li>- QRS 130-149 ms</li> <li>- non-LBBB</li> <li>- SR</li> </ul>                                                                     |
|                   | IIa/C | <ul style="list-style-type: none"> <li>- Persistent or permanent AF</li> <li>- NYHA class III-IV</li> <li>- LVEF <math>\leq 35\%</math></li> <li>- QRS <math>\geq 130</math> ms</li> <li>- Strategy to ensure biventricular capture in place</li> </ul> |
| AHA/ACC/HFSA 2022 | I/B-R | <ul style="list-style-type: none"> <li>- NYHA class II-IV** despite OMT</li> <li>- LVEF <math>\leq 35\%</math></li> <li>- QRS <math>\geq 150</math> ms</li> <li>- LBBB</li> <li>- SR</li> </ul>                                                         |

|  |          |                                                                                                                                                                                                     |
|--|----------|-----------------------------------------------------------------------------------------------------------------------------------------------------------------------------------------------------|
|  | Ila/B-R  | <ul style="list-style-type: none"> <li>- NYHA class II-IV** despite OMT</li> <li>- LVEF <math>\leq 35\%</math></li> <li>- QRS <math>\geq 150</math> ms</li> <li>- non-LBBB</li> <li>- SR</li> </ul> |
|  | Ila/B-NR | <ul style="list-style-type: none"> <li>- NYHA class II-IV** despite OMT</li> <li>- LVEF <math>\leq 35\%</math></li> <li>- QRS 120-149 ms</li> <li>- LBBB</li> <li>- SR</li> </ul>                   |
|  | Ilb/B-NR | <ul style="list-style-type: none"> <li>- NYHA class III-IV** despite OMT</li> <li>- LVEF <math>\leq 35\%</math></li> <li>- QRS 120-149 ms</li> <li>- non-LBBB</li> <li>- SR</li> </ul>              |

|  |          |                                                                                                                                                                                                                                                                                                |
|--|----------|------------------------------------------------------------------------------------------------------------------------------------------------------------------------------------------------------------------------------------------------------------------------------------------------|
|  | IIb/B-NR | <ul style="list-style-type: none"> <li>- NYHA class I despite OMT</li> <li>- Ischemic cause of HF</li> <li>- LBBB</li> <li>- QRS <math>\geq 150</math> ms</li> <li>- SR</li> </ul>                                                                                                             |
|  | IIa/B-NR | <ul style="list-style-type: none"> <li>- AF</li> <li>- LVEF <math>\leq 35\%</math></li> <li>- Patient requires ventricular pacing or otherwise meets the CRT criteria</li> <li>- AV nodal ablation or pharmacological rate control will allow near 100% ventricular pacing with CRT</li> </ul> |

\*\*(NYHA class IV patients should be ambulatory = No admissions for HF during the last month and a reasonable expectation of survival >6 months)

The meaning of colors:

Green = class I of recommendation (indicated/ recommended)

Yellow = class IIa of recommendation (should be considered)

Orange = class IIb of recommendation (may be considered)

Red = class III of recommendation (contraindicated/ not recommended)

AF – atrial fibrillation; ACC – American College of Cardiology; AHA – American Heart Association; AV – atrioventricular; CRT – cardiac resynchronization therapy; LVEF – left ventricular ejection fraction; ESC – European Society of Cardiology; HF – heart failure; HFSA – Heart Failure Society of America; HRS – Heart Rhythm Society; LBBB – left bundle branch block; LOE – level of evidence; NYHA – New York Heart Association; OMT – optimal medical treatment; RV – right ventricle; SR – sinus rhythm
